# Supplementary material for: Photophysical dynamics of the efficient emission and photosensitization of [Ir(pqi)2(NN)]+complexes
Source: Royal Society of Chemistry journal article supplement (doi:10.1039/c7dt03930a), 2017-12-12
Supplement: c7dt03930a1.pdf [file c7dt03930a1.pdf]

## Supporting Information

# Photophysical Dynamics of the Efficient Emission and Photosensitization of $[\text{Ir}(\text{pqi})_2(\text{NN})]^+$ Complexes

*Kassio P.S. Zanoni, Akitaka Ito, Malte Grüner, Neyde Y. Murakami Iha and Andrea S. S. de Camargo*

### **General Experimental Procedures**

#### *Measurements for structural characterization*

$^1\text{H}$  NMR spectra were recorded using a Bruker AIII 500 (500 MHz) or an INOVA 300 (300 MHz) spectrometer, using  $\text{CD}_3\text{CN}$  as solvent. The residual solvent signals were employed as internal standards.

Mass spectroscopy was performed using a Bruker Daltonics MAXIS HD.

#### *Photophysical measurements*

UV-Vis absorption spectra were recorded on a Hewlett-Packard diode array spectrophotometer model 8453. Steady-state and time-resolved emission spectra were recorded using a Horiba Fluorolog time-correlated single photon-counting or an ISS-PC1 photon-counting spectrofluorometer. For experiments using the Horiba Fluorolog, a xenon lamp ( $\lambda_{\text{exc}} = 365$  nm, 1 nm bandwidth, 400 nm long pass filter) or a Horiba Delta Diode source ( $\lambda_{\text{exc}} = 370$  nm, frequency = 20 kHz) were employed as excitation sources for steady-state or time-resolved measurements, respectively. When using the ISS-PC1, a xenon lamp ( $\lambda_{\text{exc}} = 365$  nm, 2 nm bandwidth, 389 nm long pass filter) or an ISS laser ( $\lambda_{\text{exc}} = 378$  nm, frequency = 20 kHz) were employed. Emission intensities (photon counting) of steady-state spectra were corrected for the system spectral response. For room temperature measurements, the absorbance of sample solutions in acetonitrile was set between 0.1 and 0.3 in a quartz cuvette with 1.000 cm optical path length. Solutions were

deoxygenated with N<sub>2</sub> or Ar for at least 10 minutes prior to measurement. For 77 K experiments, samples were prepared in a 4/5 (v/v) mixture of propionitrile/butyronitrile (prop:but) in cylindrical quartz tubes, 0.4 cm radius, and were inserted into a Dewar flask containing liquid N<sub>2</sub>.

Absolute emission quantum yields ( $\phi_0$ ) of the complexes in degassed acetonitrile at room temperature were measured applying the methodology described by de Mello *et al.*,<sup>1</sup> using a BaSO<sub>4</sub> coated integrating sphere, Horiba Quanta- $\phi$ , with samples positioned in its center.

The radiative ( $k_r$ ) and nonradiative decay ( $k_{nr}$ ) rates were calculated by Equations SI1a and SI1b,

$$k_r = \frac{\phi_0}{\tau_0} \quad (SI1a)$$

$$k_{nr} = \frac{1 - \phi_0}{\tau_0} \quad (SI1b)$$

in which  $\tau_0$  is the emission lifetime of the sample in degassed solvent.

Singlet oxygen quantum yields ( $\Phi_\Delta$ ) in deuterated acetonitrile were obtained from Equation SI2<sup>2,3</sup> using [Ru(bpy)<sub>3</sub>]<sup>2+</sup> in the same solvent as a reference ( $\Phi_\Delta = 0.57^4$ ),

$$\Phi_\Delta^s = \Phi_\Delta^{Ref} \frac{I^s}{I^{Ref}} \frac{1 - 10^{-A^{Ref}}}{1 - 10^{-A^s}} \quad (SI2)$$

in which  $\Phi_\Delta^s$  is the singlet oxygen quantum yield of the sample,  $\Phi_\Delta^{ref}$  is the singlet oxygen quantum yield of the reference,  $A^s$  and  $A^{ref}$  are the absorbances at the excitation wavelength of sample and reference solutions;  $I^s$  and  $I^{ref}$  are the integrals of the oxygen's emission spectrum for sample and reference solutions.

The quenching rate constant ( $k_q$ ) was obtained by Stern–Volmer analyses using Equation SI3,<sup>5</sup>

$$\frac{\phi_0}{\phi} = k_q \tau_0 [{}^3\text{O}_2] + 1 \quad (\text{SI3})$$

in which  $\phi$  is the emission quantum yield of the complex in a sample solution with a known  $[{}^3\text{O}_2]$  concentration and  $\tau_0$  is the  $T_1$ 's lifetime in the degassed solution.

The  $x$  and  $y$  CIE coordinates were calculated by Equations SI4a and SI4b from their  $X$ ,  $Y$  and  $Z$  tristimulus, Equations SI5a to SI5c, using photoluminescence spectral data in acetonitrile at 298 K. The numerical values of the CIE standard  $\bar{x}(\lambda)$ ,  $\bar{y}(\lambda)$  and  $\bar{z}(\lambda)$ , are available as online free-access tables.<sup>6</sup>

$$x = \frac{X}{X + Y + Z} \quad (\text{SI4a})$$

$$y = \frac{Y}{X + Y + Z} \quad (\text{SI4b})$$

$$X = \int_{380}^{780} I(\lambda) \bar{x}(\lambda) d\lambda \quad (\text{SI5a})$$

$$Y = \int_{380}^{780} I(\lambda) \bar{y}(\lambda) d\lambda \quad (\text{SI5b})$$

$$Z = \int_{380}^{780} I(\lambda) \bar{z}(\lambda) d\lambda \quad (\text{SI5c})$$

### *Franck-Condon spectral analyses*

In the fitting procedure,  $E_0$ ,  $\hbar\omega$ ,  $S$  and  $\tilde{\nu}_{1/2}$  (Equation 1 in the Article) were optimized with a least-squares minimization routine with application of a Generalized Reduced Gradient (GRG2) algorithm.<sup>7</sup> Prior to the spectral fitting analysis, the number of photons at a given wavelength were corrected to the wavenumber scale by using the relationship,<sup>8</sup>  $I(\tilde{\nu}) = I(\lambda) \times \lambda^2$ . The summation was carried out from  $\nu^* = 0$  in the excited state to levels  $\nu = 0 \rightarrow 10$  in the ground state.

### *Theoretical calculations*

Molecular-orbital calculations for the complex were conducted with the Gaussian 09W software.<sup>9</sup> Optimization of the ground-state geometry was performed by using DFT with the B3LYP functional. The LanL2DZ<sup>10-12</sup> and 6-31G(d,p)<sup>13,14</sup> basis sets were used to treat iridium and all other atoms, respectively. TD-DFT calculations were then performed to estimate energies and oscillator strengths of the lowest-lying 50 singlet and 3 triplet transitions; the triplet calculations were performed using the singlet-optimized geometries. All the calculations were carried out in acetonitrile as solvent by using a Polarizable Continuum Model (PCM).<sup>15,16</sup> Kohn–Sham orbitals were plotted using GaussView 5.0.<sup>17</sup>

## General Results and Discussions

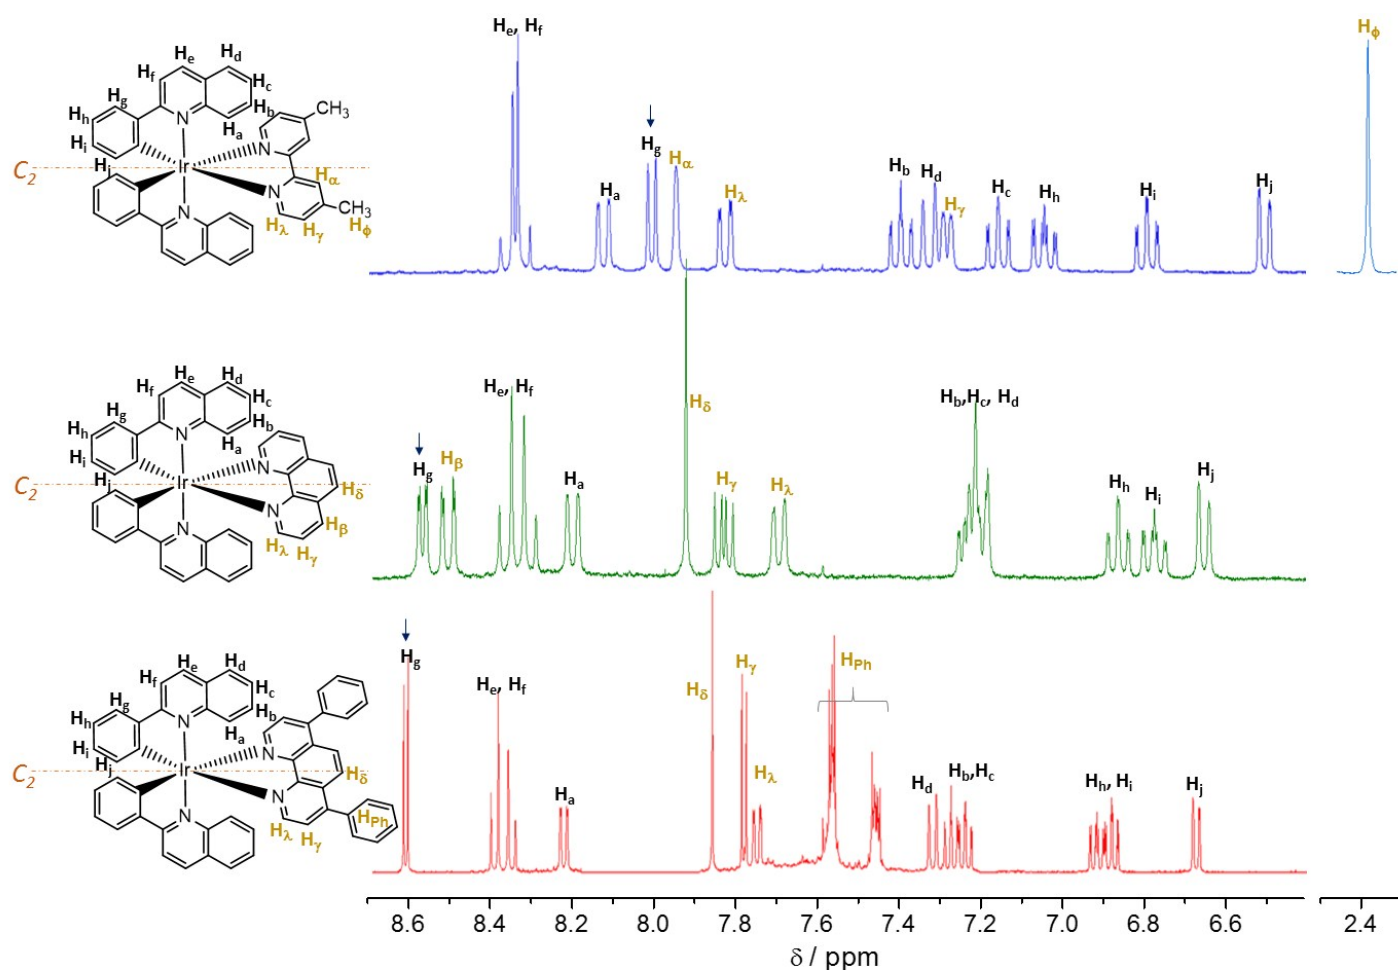

**Figure S11.** <sup>1</sup>H NMR spectra for the investigated [Ir(pqi)<sub>2</sub>(NN)]<sup>+</sup> complexes in CD<sub>3</sub>CN. For all compounds, the <sup>1</sup>H NMR spectra exhibit only one set of ten aromatic signals for *pqi* and one set for the *NN* diimine ligands whose total signal integration is equal to half of the amount of protons in these ligands. These facts indicate the two *pqi* ligands are equivalent and the complex symmetry is C<sub>2</sub>, where the C<sub>2</sub> axis bisects the *NN* ligand. Interestingly, the change of the ancillary *NN* ligand leads to electronic perturbations in the phenyl portion of the cyclometalated *pqi* ligand, which holds the organometallic C–Ir bond. The H<sub>g</sub> proton (meta to the C–Ir bond), for example, is deshielded by changing the diimine ligand from *dmb* (8.00 ppm) to *phen* (8.57 ppm) then to *Ph<sub>2</sub>phen* (8.62 ppm) as an evidence to the stronger electron-withdrawing nature of the phenanthroline ligands, as opposed to the electron donation from *dmb*. This effect has interesting consequences on the photophysical characteristics of the complexes, as discussed in the Article. The <sup>1</sup>H NMR spectra also indicate that the isolated powders of the synthesized compounds have no impurities.

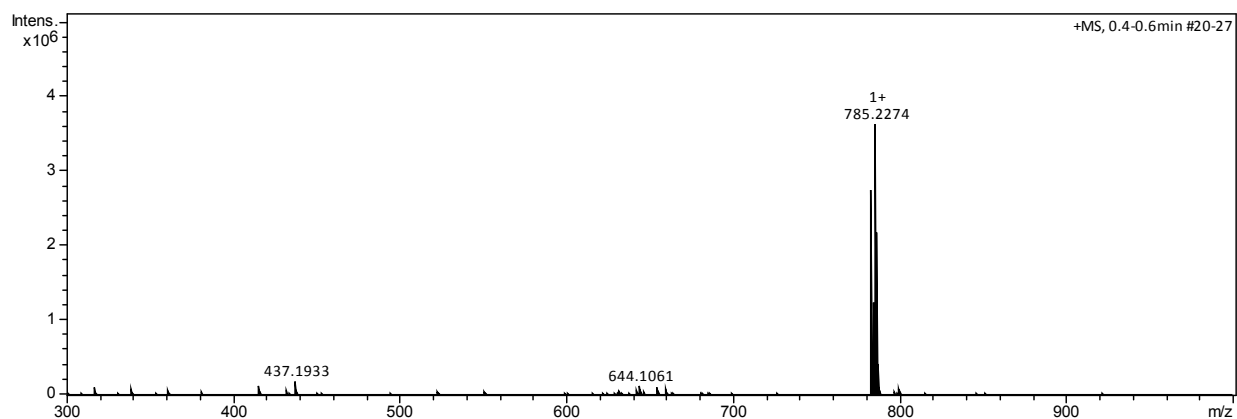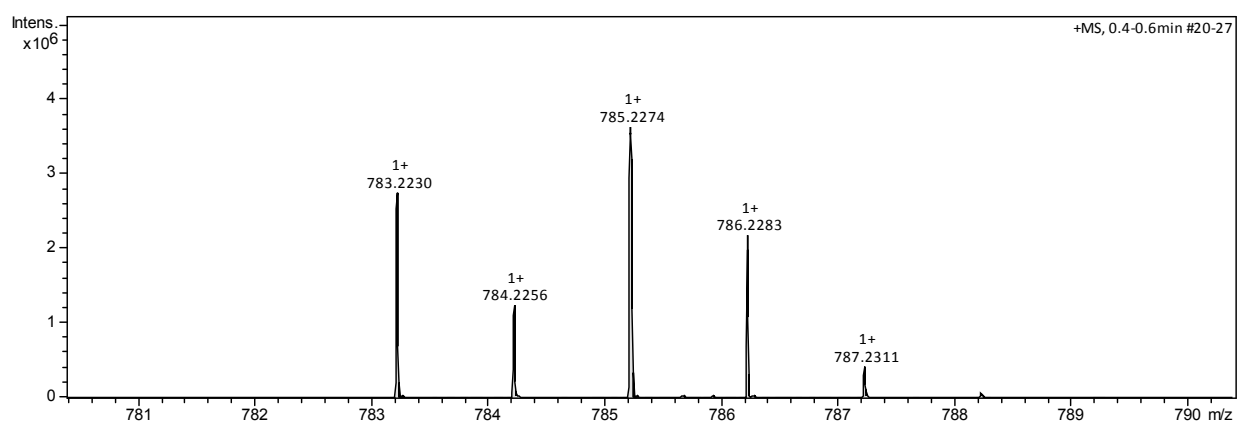

**Figure SI2.** Mass spectra for **pqlrDmb** in acetonitrile.

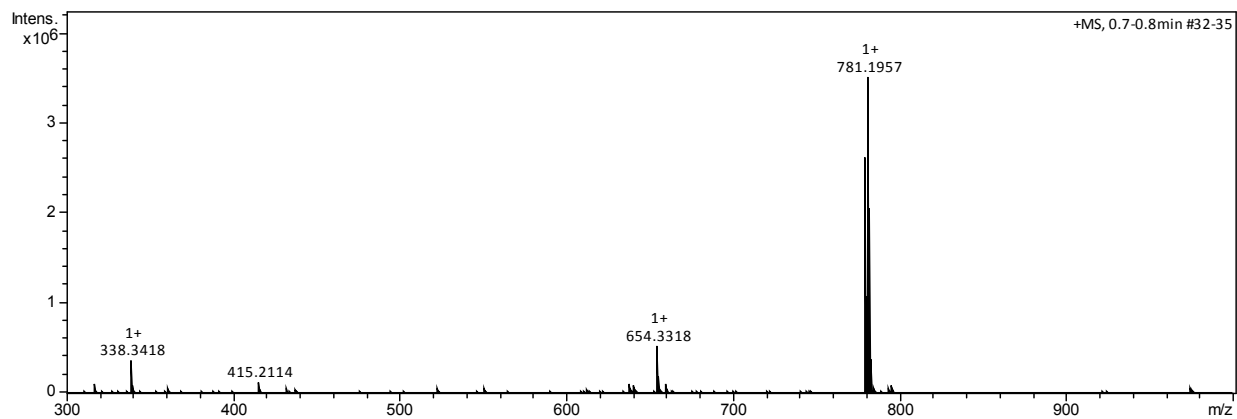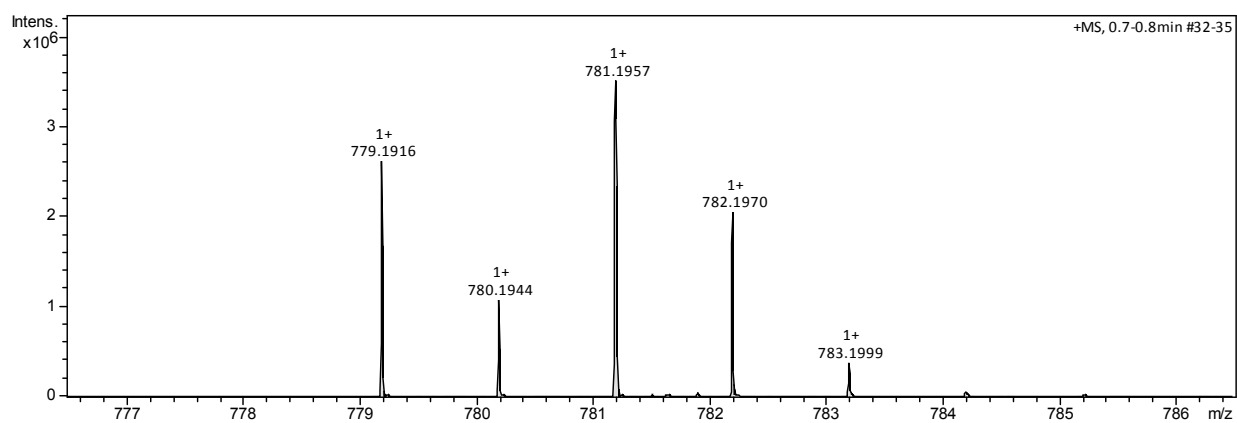

**Figure S13.** Mass spectra for **pqlrPhen** in acetonitrile.

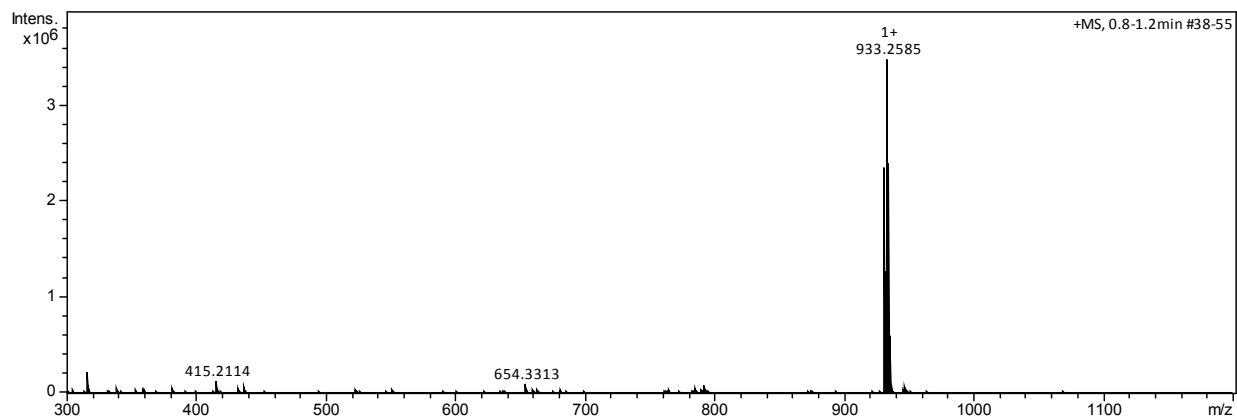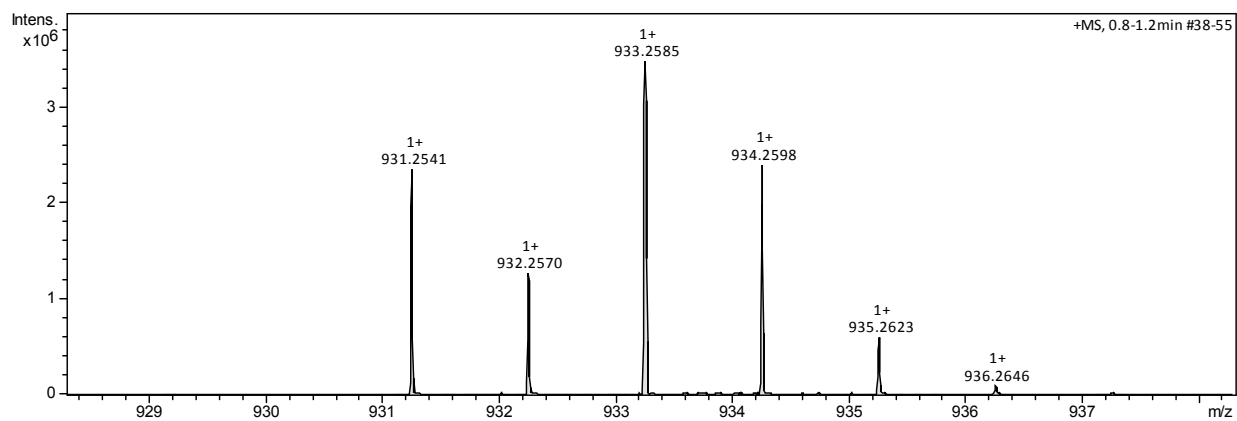

**Figure S14.** Mass spectra for **pqlrPh<sub>2</sub>phen** in acetonitrile.



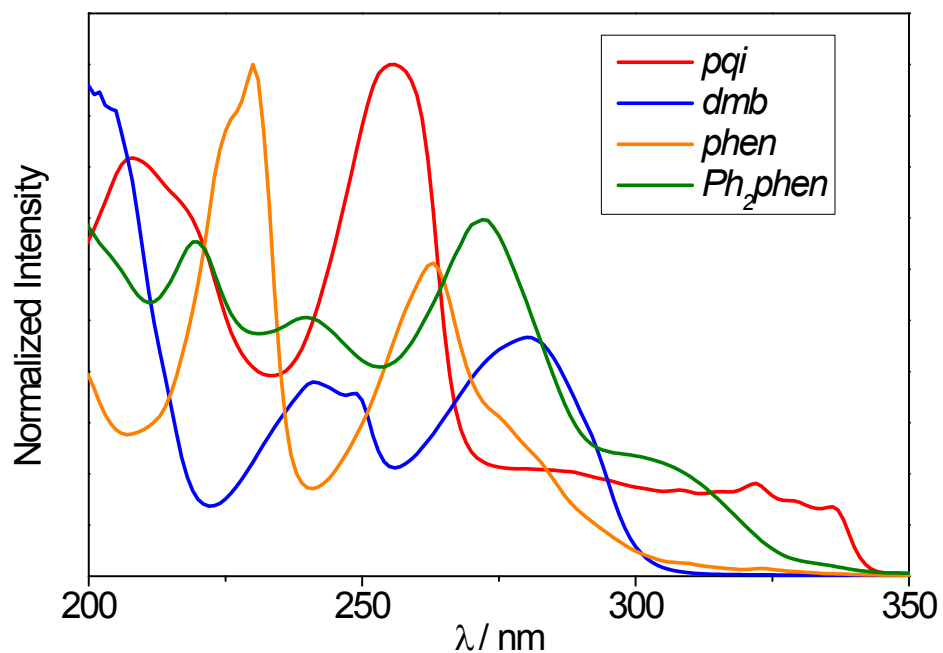

**Figure SI5.** Absorption spectra for the free, non-coordinated ligand in acetonitrile at 298 K. The low energy  $\pi\pi^*$  transitions within the *pqi* ligands are more stabilized than for the *NN* ligands, hence  ${}^1\text{LC}_{pqi}$  transitions exert a higher influence on the complex's light absorption at lower energies.

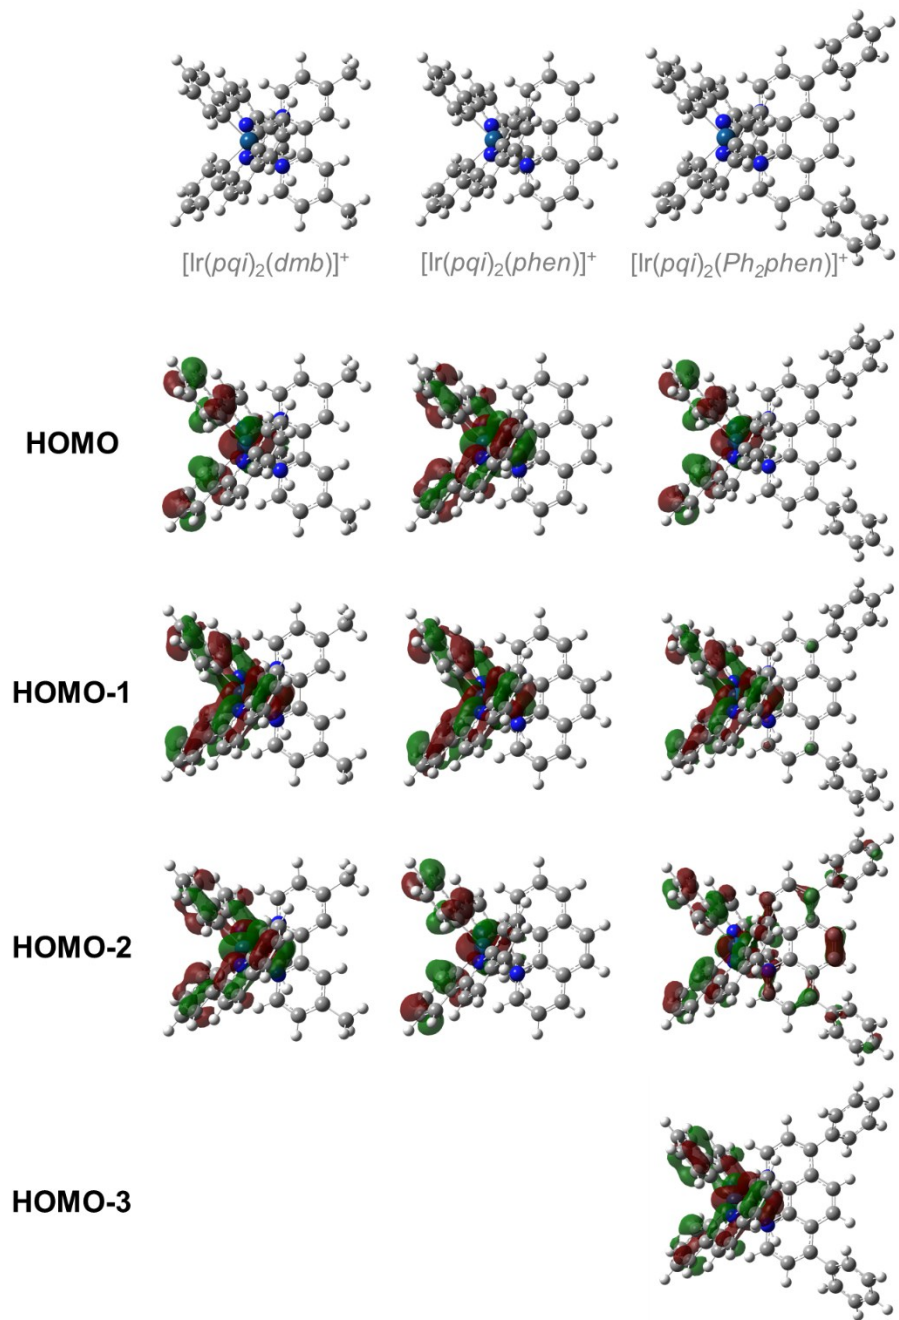

**Figure SI6.** Orbital contours ( $0.03 \text{ e}\text{\AA}^{-3}$ ) for HOMO sets related to  $S_1$ – $S_4$  and  $T_1$ – $T_3$  excited states in the  $[\text{Ir}(\text{pqi})_2(\text{NN})]^+$  series.

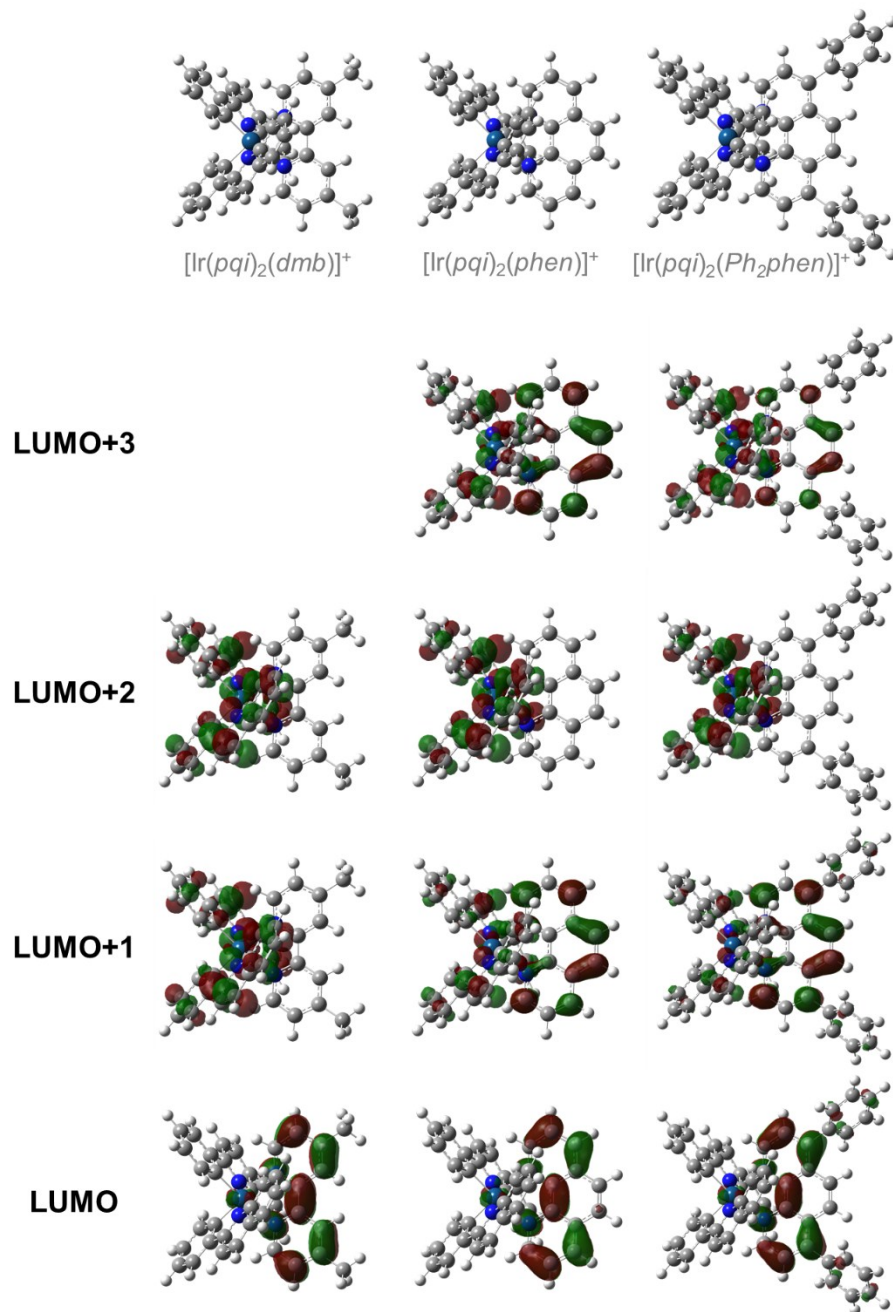

**Figure SI7.** Orbital contours ( $0.03 \text{ e}\text{\AA}^{-3}$ ) for LUMO sets related to  $S_1$ – $S_4$  and  $T_1$ – $T_3$  excited states in the  $[\text{Ir}(\text{pqi})_2(\text{NN})]^+$  series.

**Table S11.** Calculated Excited States for  $[\text{Ir}(\text{pqi})_2(\text{dmb})]^+$  in  $\text{CH}_3\text{CN}$ .

| Excited State   | Transition          | Energy (Wavelength)   | Oscillator Strength |
|-----------------|---------------------|-----------------------|---------------------|
| S <sub>1</sub>  | MO164 → MO165 (77%) | 2.6539 eV (467.17 nm) | 0.0092              |
|                 | MO164 → MO167 (23%) |                       |                     |
| S <sub>2</sub>  | MO164 → MO166       | 2.7224 eV (455.42 nm) | 0.0024              |
| S <sub>3</sub>  | MO164 → MO167       | 2.7297 eV (454.20 nm) | 0.0525              |
| S <sub>4</sub>  | MO161 → MO165 (17%) | 3.3231 eV (373.10 nm) | 0.0337              |
|                 | MO163 → MO165 (83%) |                       |                     |
| S <sub>5</sub>  | MO161 → MO166 (25%) | 3.3558 eV (369.46 nm) | 0.0290              |
|                 | MO163 → MO166 (75%) |                       |                     |
| S <sub>6</sub>  | MO161 → MO167 (22%) | 3.3982 eV (364.85 nm) | 0.0161              |
|                 | MO163 → MO167 (78%) |                       |                     |
| S <sub>7</sub>  | MO162 → MO165 (81%) | 3.4397 eV (360.45 nm) | 0.0085              |
|                 | MO163 → MO166 (19%) |                       |                     |
| S <sub>8</sub>  | MO162 → MO167 (84%) | 3.5498 eV (349.27 nm) | 0.0525              |
|                 | MO163 → MO166 (16%) |                       |                     |
| S <sub>9</sub>  | MO162 → MO166 (61%) | 3.5566 eV (348.61 nm) | 0.0275              |
|                 | MO163 → MO165 (16%) |                       |                     |
|                 | MO163 → MO167 (23%) |                       |                     |
| S <sub>10</sub> | MO162 → MO167 (28%) | 3.5894 eV (345.42 nm) | 0.0268              |
|                 | MO163 → MO166 (12%) |                       |                     |
|                 | MO164 → MO168 (60%) |                       |                     |
| S <sub>11</sub> | --                  | 3.6359 eV (341.00 nm) | 0.0065              |
| S <sub>12</sub> | --                  | 3.6560 eV (339.13 nm) | 0.1952              |
| S <sub>13</sub> | --                  | 3.6883 eV (336.16 nm) | 0.0439              |
| S <sub>14</sub> | --                  | 3.7794 eV (328.06 nm) | 0.0069              |
| S <sub>15</sub> | --                  | 3.8105 eV (325.38 nm) | 0.0338              |

HOMO: MO164, LUMO: MO165

**Table SI2.** Calculated Excited States for  $[\text{Ir}(\text{pqi})_2(\text{phen})]^+$  in  $\text{CH}_3\text{CN}$ .

| Excited State   | Transition                                                                                                      | Energy (Wavelength)   | Oscillator Strength |
|-----------------|-----------------------------------------------------------------------------------------------------------------|-----------------------|---------------------|
| S <sub>1</sub>  | MO162 → MO163                                                                                                   | 2.6030 eV (476.31 nm) | 0.0004              |
| S <sub>2</sub>  | MO162 → MO164                                                                                                   | 2.6529 eV (467.35 nm) | 0.0002              |
| S <sub>3</sub>  | MO162 → MO165                                                                                                   | 2.7323 eV (453.77 nm) | 0.0620              |
| S <sub>4</sub>  | MO162 → MO164 (14%)<br>MO162 → MO166 (86%)                                                                      | 2.9249 eV (423.89 nm) | 0.0059              |
| S <sub>5</sub>  | MO159 → MO163 (19%)<br>MO161 → MO163 (81%)                                                                      | 3.2737 eV (378.73 nm) | 0.0431              |
| S <sub>6</sub>  | MO159 → MO164 (22%)<br>MO161 → MO164 (78%)                                                                      | 3.3072 eV (374.90 nm) | 0.0384              |
| S <sub>7</sub>  | MO160 → MO163                                                                                                   | 3.3824 eV (366.56 nm) | 0.0002              |
| S <sub>8</sub>  | MO159 → MO165 (16%)<br>MO160 → MO164 (35%)<br>MO161 → MO165 (49%)                                               | 3.4132 eV (363.25 nm) | 0.0049              |
| S <sub>9</sub>  | MO159 → MO163 (43%)<br>MO160 → MO164 (57%)                                                                      | 3.4991 eV (354.33 nm) | 0.0288              |
| S <sub>10</sub> | MO155 → MO165 (10%)<br>MO158 → MO165 (10%)<br>MO159 → MO166 (15%)<br>MO161 → MO164 (17%)<br>MO161 → MO166 (48%) | 3.5307 eV (351.16 nm) | 0.0045              |
| S <sub>11</sub> | --                                                                                                              | 3.5603 eV (348.24 nm) | 0.0040              |
| S <sub>12</sub> | --                                                                                                              | 3.5788 eV (346.45 nm) | 0.1236              |
| S <sub>13</sub> | --                                                                                                              | 3.5881 eV (345.54 nm) | 0.0673              |
| S <sub>14</sub> | --                                                                                                              | 3.6845 eV (336.50 nm) | 0.0577              |
| S <sub>15</sub> | --                                                                                                              | 3.7094 eV (334.24 nm) | 0.0056              |

HOMO: MO162, LUMO: MO163

**Table S13.** Calculated Excited States for  $[\text{Ir}(\text{pqi})_2(\text{Ph}_2\text{phen})]^+$  in  $\text{CH}_3\text{CN}$ .

| Excited State   | Transition                                                                               | Energy (Wavelength)   | Oscillator Strength |
|-----------------|------------------------------------------------------------------------------------------|-----------------------|---------------------|
| S <sub>1</sub>  | MO202 → MO203                                                                            | 2.5732 eV (481.83 nm) | 0.0010              |
| S <sub>2</sub>  | MO202 → MO204                                                                            | 2.6197 eV (473.29 nm) | 0.0007              |
| S <sub>3</sub>  | MO202 → MO205                                                                            | 2.7275 eV (454.57 nm) | 0.0600              |
| S <sub>4</sub>  | MO202 → MO204 (18%)<br>MO202 → MO206 (82%)                                               | 2.8743 eV (431.36 nm) | 0.0050              |
| S <sub>5</sub>  | MO200 → MO203 (17%)<br>MO201 → MO203 (83%)                                               | 3.2163 eV (385.49 nm) | 0.1207              |
| S <sub>6</sub>  | MO200 → MO204 (16%)<br>MO201 → MO204 (84%)                                               | 3.2478 eV (381.75 nm) | 0.0860              |
| S <sub>7</sub>  | MO198 → MO203 (22%)<br>MO199 → MO203 (78%)                                               | 3.3520 eV (369.88 nm) | 0.0015              |
| S <sub>8</sub>  | MO194 → MO205 (13%)<br>MO200 → MO205 (18%)<br>MO201 → MO205 (69%)                        | 3.3797 eV (366.85 nm) | 0.0045              |
| S <sub>9</sub>  | MO200 → MO203                                                                            | 3.4349 eV (360.96 nm) | 0.0549              |
| S <sub>10</sub> | MO199 → MO205 (15%)<br>MO200 → MO206 (14%)<br>MO201 → MO204 (17%)<br>MO201 → MO206 (54%) | 3.4658 eV (357.74 nm) | 0.0080              |
| S <sub>11</sub> | --                                                                                       | 3.4987 eV (354.37 nm) | 0.0195              |
| S <sub>12</sub> | --                                                                                       | 3.5031 eV (353.93 nm) | 0.0876              |
| S <sub>13</sub> | --                                                                                       | 3.5704 eV (347.26 nm) | 0.0762              |
| S <sub>14</sub> | --                                                                                       | 3.6502 eV (339.66 nm) | 0.0551              |
| S <sub>15</sub> | --                                                                                       | 3.6707 eV (337.76 nm) | 0.0161              |

HOMO: MO202, LUMO: MO203

**Table SI4.** Molecular-Orbital contributions for  $[\text{Ir}(\text{pqi})_2(\text{dmb})]^+$  in  $\text{CH}_3\text{CN}$ .

| Molecular Orbital | Eigenvalue /hartree | MO Population / % |            |           |            |        |
|-------------------|---------------------|-------------------|------------|-----------|------------|--------|
|                   |                     | Ir                | <i>pqi</i> |           | <i>dmb</i> |        |
|                   |                     |                   | phenyl     | quinoline | bpy        | methyl |
| 172 (LUMO+7)      | -0.00933            | 12.59             | 35.31      | 38.53     | 13.46      | 0.11   |
| 171 (LUMO+6)      | -0.03966            | 1.59              | 10.34      | 35.02     | 50.18      | 2.87   |
| 170 (LUMO+5)      | -0.04262            | 2.41              | 15.91      | 53.24     | 27.94      | 0.50   |
| 169 (LUMO+4)      | -0.04321            | 0.27              | 6.66       | 46.82     | 44.55      | 1.70   |
| 168 (LUMO+3)      | -0.05165            | 3.65              | 6.48       | 21.81     | 66.86      | 1.20   |
| 167 (LUMO+2)      | -0.08052            | 3.02              | 15.02      | 78.37     | 3.46       | 0.13   |
| 166 (LUMO+1)      | -0.08171            | 3.75              | 15.78      | 77.04     | 3.36       | 0.07   |
| 165 (LUMO)        | -0.08372            | 3.39              | 0.64       | 3.82      | 87.99      | 4.16   |
| 164 (HOMO)        | -0.20639            | 47.78             | 39.63      | 9.43      | 3.12       | 0.04   |
| 163 (HOMO-1)      | -0.22873            | 30.63             | 27.18      | 37.96     | 4.01       | 0.22   |
| 162 (HOMO-2)      | -0.23564            | 41.16             | 18.27      | 38.81     | 1.73       | 0.03   |
| 161 (HOMO-3)      | -0.23830            | 32.98             | 33.18      | 28.88     | 4.63       | 0.33   |
| 160 (HOMO-4)      | -0.24283            | 20.44             | 41.38      | 36.73     | 1.38       | 0.07   |
| 159 (HOMO-5)      | -0.24677            | 5.35              | 78.14      | 11.85     | 4.60       | 0.06   |
| 158 (HOMO-6)      | -0.25587            | 34.20             | 5.40       | 47.34     | 12.63      | 0.43   |
| 157 (HOMO-7)      | -0.25600            | 29.11             | 5.53       | 54.88     | 10.04      | 0.44   |

**Table SI5.** Molecular-Orbital contributions for  $[\text{Ir}(\text{pqi})_2(\text{phen})]^+$  in  $\text{CH}_3\text{CN}$ .

| Molecular Orbital | Eigenvalue /hartree | MO Population / % |            |           |             |  |
|-------------------|---------------------|-------------------|------------|-----------|-------------|--|
|                   |                     | Ir                | <i>pqi</i> |           | <i>phen</i> |  |
|                   |                     |                   | phenyl     | quinoline | phen        |  |
| 170 (LUMO+7)      | -0.01016            | 4.14              | 5.52       | 20.52     | 69.82       |  |
| 169 (LUMO+6)      | -0.03532            | 3.28              | 3.25       | 12.49     | 80.98       |  |
| 168 (LUMO+5)      | -0.04182            | 1.39              | 17.41      | 79.81     | 1.39        |  |
| 167 (LUMO+4)      | -0.04686            | 1.71              | 19.59      | 65.53     | 13.17       |  |
| 166 (LUMO+3)      | -0.07734            | 1.82              | 7.24       | 42.03     | 48.91       |  |
| 165 (LUMO+2)      | -0.08089            | 3.76              | 15.02      | 78.66     | 2.56        |  |
| 164 (LUMO+1)      | -0.08618            | 2.13              | 8.64       | 38.62     | 50.61       |  |
| 163 (LUMO)        | -0.08686            | 3.65              | 0.63       | 3.41      | 92.31       |  |
| 162 (HOMO)        | -0.20728            | 47.20             | 40.02      | 9.69      | 3.09        |  |
| 161 (HOMO-1)      | -0.22983            | 27.79             | 28.62      | 39.36     | 4.23        |  |
| 160 (HOMO-2)      | -0.23661            | 38.33             | 19.65      | 40.26     | 1.76        |  |
| 159 (HOMO-3)      | -0.23859            | 34.07             | 29.35      | 26.95     | 9.63        |  |
| 158 (HOMO-4)      | -0.24348            | 20.49             | 39.86      | 38.50     | 1.15        |  |
| 157 (HOMO-5)      | -0.24738            | 5.13              | 77.26      | 9.85      | 7.76        |  |
| 156 (HOMO-6)      | -0.25260            | 6.82              | 4.09       | 48.85     | 40.24       |  |
| 155 (HOMO-7)      | -0.25724            | 43.77             | 5.60       | 40.01     | 10.62       |  |

**Table SI6.** Molecular-Orbital contributions for  $[\text{Ir}(\text{pqi})_2(\text{Ph}_2\text{phen})]^+$  in  $\text{CH}_3\text{CN}$ .

| Molecular<br>Orbital | Eigenvalue<br>/hartree | MO Population / % |            |           |                           |        |
|----------------------|------------------------|-------------------|------------|-----------|---------------------------|--------|
|                      |                        | Ir                | <i>pqi</i> |           | <i>Ph<sub>2</sub>phen</i> |        |
|                      |                        |                   | phenyl     | quinoline | phen                      | phenyl |
| 210 (LUMO+7)         | -0.02894               | 0.20              | 0.81       | 3.70      | 47.79                     | 47.50  |
| 209 (LUMO+6)         | -0.03901               | 1.80              | 5.40       | 18.48     | 60.07                     | 14.25  |
| 208 (LUMO+5)         | -0.04177               | 1.35              | 16.93      | 78.92     | 1.97                      | 0.83   |
| 207 (LUMO+4)         | -0.04730               | 1.68              | 16.66      | 56.52     | 21.99                     | 3.15   |
| 206 (LUMO+3)         | -0.07862               | 2.55              | 10.16      | 55.86     | 27.60                     | 3.83   |
| 205 (LUMO+2)         | -0.08070               | 3.66              | 15.08      | 78.97     | 2.27                      | 0.02   |
| 204 (LUMO+1)         | -0.08791               | 1.37              | 5.48       | 23.58     | 61.69                     | 7.88   |
| 203 (LUMO)           | -0.08824               | 3.73              | 0.49       | 2.68      | 83.60                     | 9.50   |
| 202 (HOMO)           | -0.20689               | 47.29             | 39.80      | 9.55      | 3.27                      | 0.09   |
| 201 (HOMO-1)         | -0.22878               | 33.84             | 22.03      | 32.61     | 8.87                      | 2.65   |
| 200 (HOMO-2)         | -0.23559               | 19.10             | 28.51      | 21.77     | 21.50                     | 9.12   |
| 199 (HOMO-3)         | -0.23626               | 39.18             | 19.25      | 39.27     | 2.08                      | 0.22   |
| 198 (HOMO-4)         | -0.24301               | 21.42             | 39.74      | 35.59     | 2.05                      | 1.20   |
| 197 (HOMO-5)         | -0.24502               | 2.41              | 44.02      | 20.18     | 23.73                     | 9.66   |
| 196 (HOMO-6)         | -0.24820               | 3.92              | 44.49      | 34.47     | 12.45                     | 4.67   |
| 195 (HOMO-7)         | -0.25357               | 19.57             | 3.84       | 29.95     | 20.32                     | 26.32  |



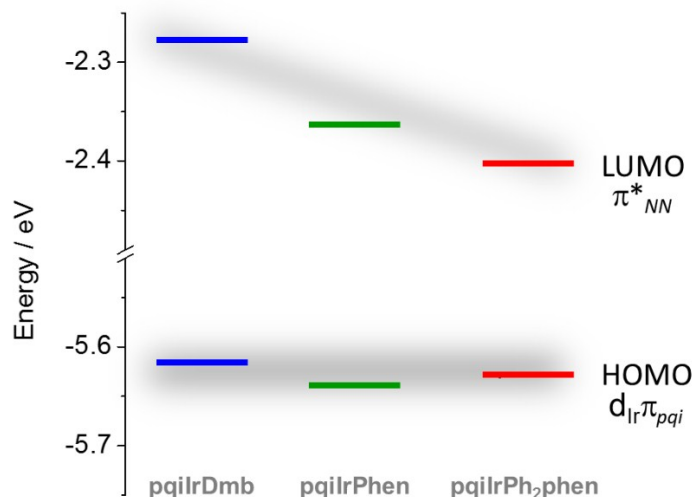

**Figure SI8.** HOMO and LUMO energies (involved in the  $S_1$  transition) calculated by B3LYP/LanL2DZ (Ir) and B3LYP/6-31(d,p) (CHN). A typical trend for heteroleptic  $[\text{Ir}(\text{NC})_2(\text{NN})]^+$  complexes<sup>18–22</sup> can be observed: the electron-donating  $\text{CH}_3$  moiety in *dmb* increases the  $\pi^*_{\text{NN}}$  (LUMO) energy in opposite to electron-withdrawing phenyl groups in  $\text{Ph}_2\text{phen}$  that stabilizes  $\pi^*_{\text{NN}}$ ; in parallel, the  $d_{\text{Ir}}\pi_{\text{pqi}}$  (HOMO) energies are practically constant among the series since the three complexes have the same *pqi* cyclometalated ligand. Consequently, the  $S_1$  state (HOMO  $\rightarrow$  LUMO) in **pqIrDmb** lies at a higher energy (2.654 eV; 467 nm) while **pqIrPh<sub>2</sub>phen**'s  $S_1$  is situated at a lower energy (2.573 eV; 482 nm). Such trend, however, cannot be directly observed in their experimental absorption spectra since the magnitude of the oscillator strength for  $S_3$  transitions (HOMO  $\rightarrow$  LUMO+2) at 454 nm is much higher than for  $S_1$ , overlapping the absorption contributions from  $S_1$  and  $S_2$  around 455 to 485 nm.

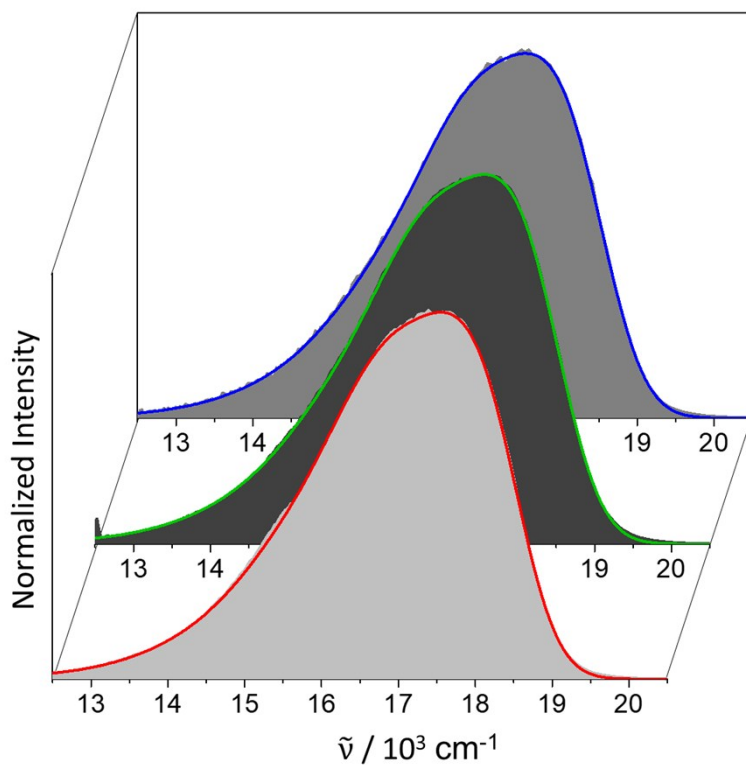

**Figure SI9.** Experimental (solid grey areas) and fitted emission spectra by use of Equation 1 of the Article with the parameters listed in Table 4 of the Article (colored solid curves) for the emission of **pqiIrDmb** (blue), **pqiIrPhen** (green) and **pqiIrPh<sub>2</sub>phen** (red) in degassed acetonitrile at 298 K.

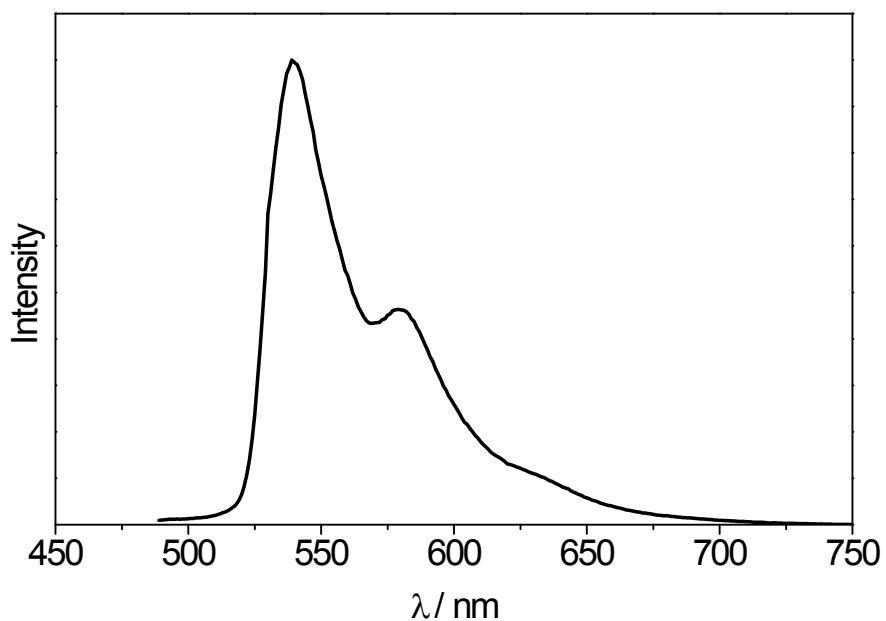

**Figure S110.** Emission spectra for the free *pqi* ligand in prop:but at 77 K ( $\lambda_{\text{em}} = 360$  nm), ascribed to the weak  $^3\pi\pi^*$  phosphorescence.

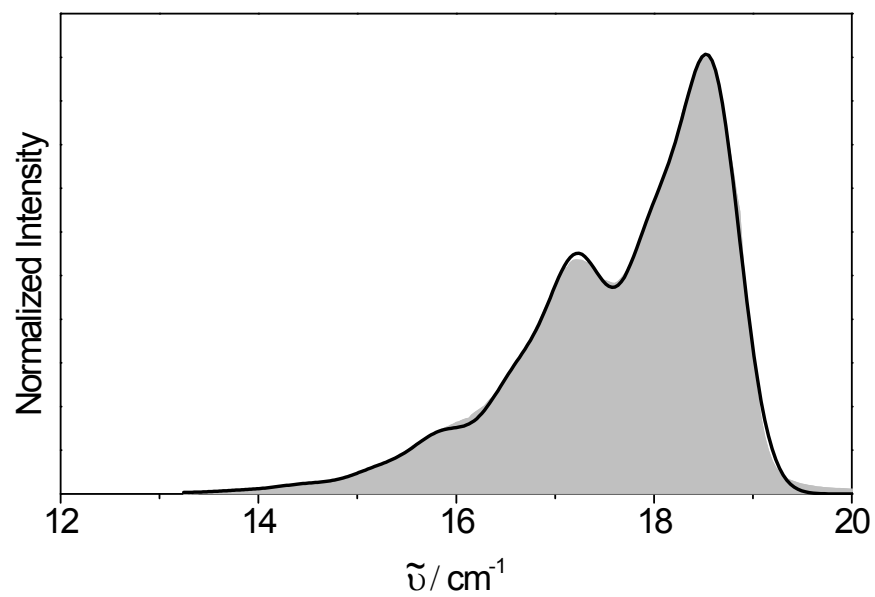

**Figure S111.** Experimental (grey area) and simulated emission spectra by use of Equation 1 of the Article with the parameters listed in Table 4 of the Article (black solid curves) for the emission of the free *pqi* ligand in prop:but at 77 K.

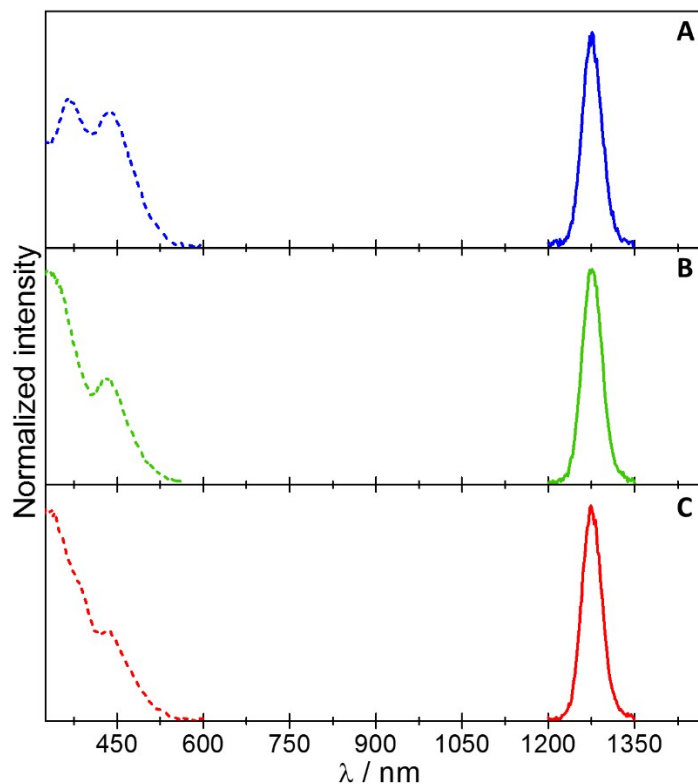

**Figure S112.** Excitation (---,  $\lambda_{\text{em}} = 1270$  nm) and emission spectra (—,  $\lambda_{\text{exc}} = 435$  nm) of oxygen-saturated acetonitrile solutions of complexes **pqiIrDmb** (A, blue), **pqiIrPhen** (B, green) and **pqiIrPh<sub>2</sub>phen** (C, red) at 298 K. For these solutions, the excitation spectra of the singlet oxygen's 1270 nm emission perfectly superimpose with the excitation spectra of the complex's 564 nm emission in degassed acetonitrile, including the direct excitation of the T<sub>1</sub> state around 525 nm. These facts indicate an efficient energy transfer from the complex to the oxygen, as ascertained by a favorable, spontaneous free energy change ( $\Delta G_{\text{en}}^0$ ) for energy transfer from complex's T<sub>1</sub> to oxygen's <sup>1</sup> $\Delta_g$  (i.e.  $\Delta G_{\text{en}}^0 = \Delta G_{1\Delta_g} - \Delta G_{T1}$ ) that ranges from -10820 to -10880 cm<sup>-1</sup> (considering  $\Delta G_{1\Delta_g} = 7940$  cm<sup>-1</sup> <sup>23</sup>), Table 6 in the Article.

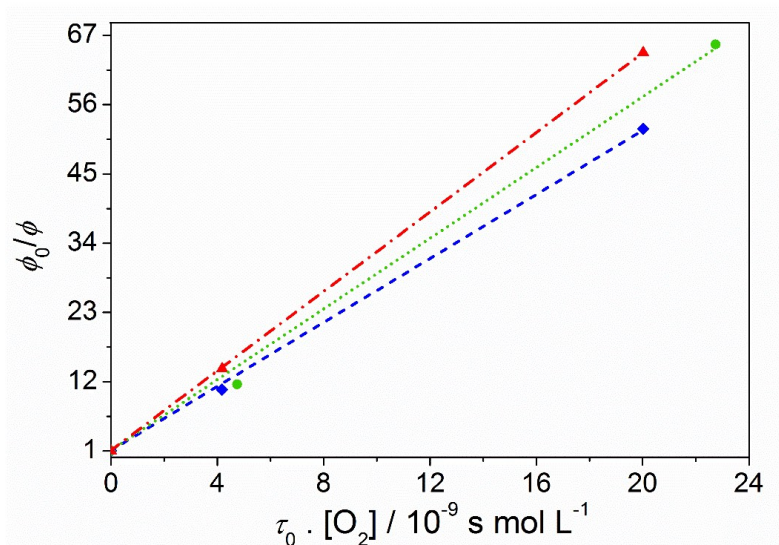

**Figure S113.** Stern–Volmer plots for **pqiIrDmb** ( $\blacklozenge$ ,  $-\text{---}$ ,  $R^2 = 0.9996$ ), **pqiIrPhen** ( $\bullet$ ,  $\cdots$ ,  $R^2 = 0.9973$ ) and **pqiIrPh<sub>2</sub>phen** ( $\blacktriangle$ ,  $-\cdot-$ ,  $R^2 = 0.9999$ ) in acetonitrile at 298 K.

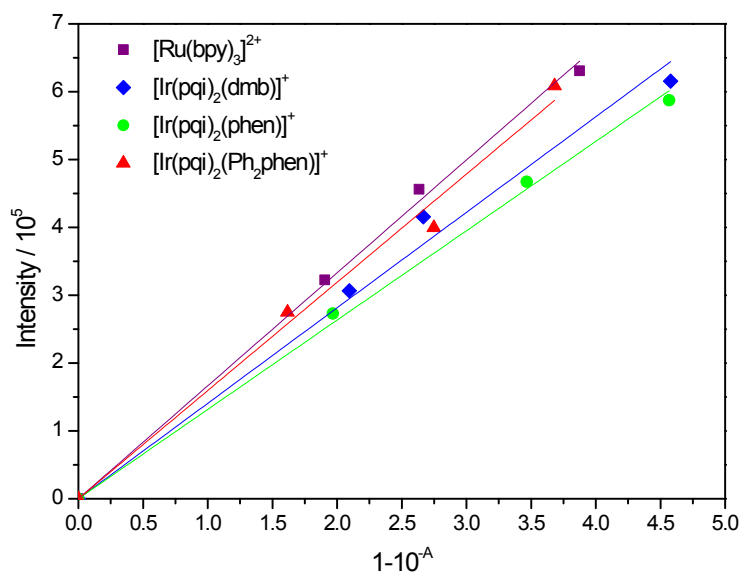

**Figure S114.** Linear fits for the plots of  $1-10^{-A_{435\text{nm}}}$  as a function of  $\text{O}_2$ 's emission intensity around 1270 nm.

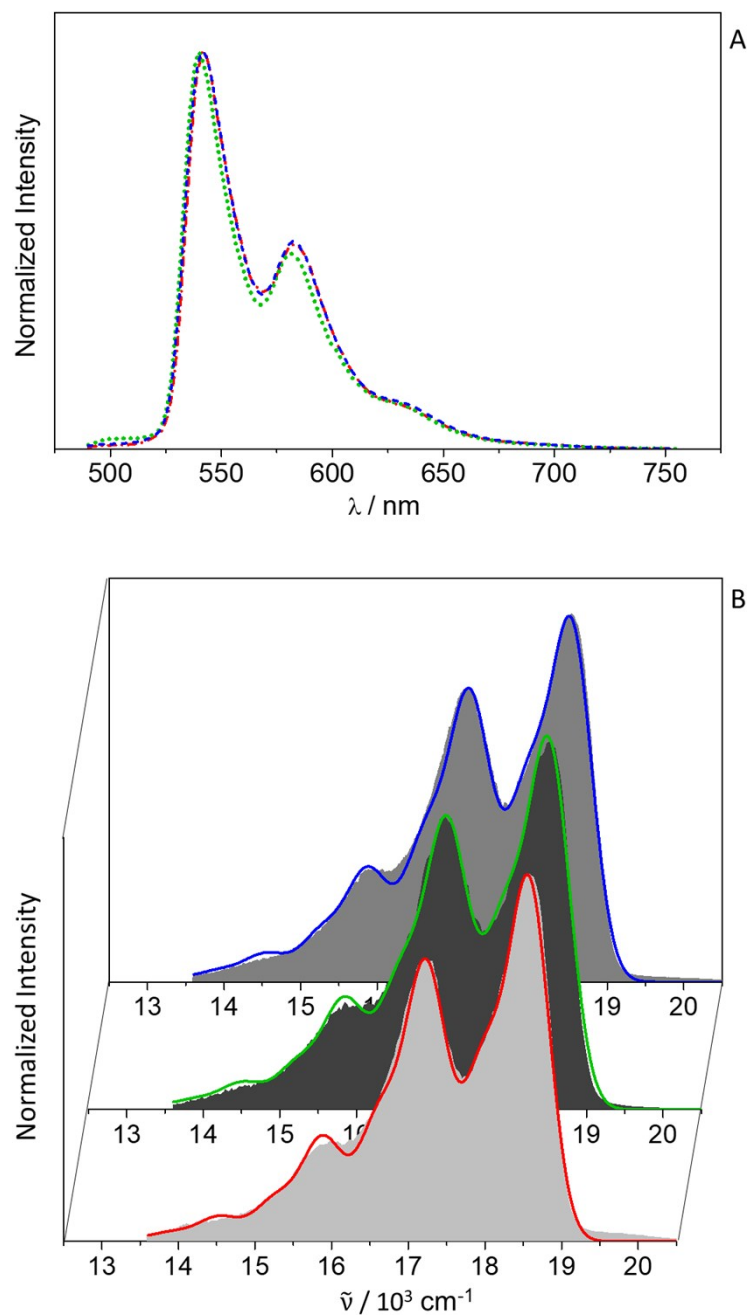

**Figure SI15.** Emission spectra for **pqiIrDmb** (blue - - -), **pqiIrPhen** (green •••) and **pqiIrPh<sub>2</sub>phen** (red -•-•) in prop:but at 77 K: (A) Experimental spectra in wavelengths, with their CIE color coordinates shown in the inset; (B) Fitted emission spectra by use of Equation 1 of the Article with the parameters listed in Table SI7 (colored solid curves) overlapped to the experimental spectra in wavenumbers (solid grey areas).

**Table SI7.** Spectral fitting parameters for the emission of **pqiIrDmb**, **pqiIrPhen**, **pqiIrPh<sub>2</sub>phen** and *pqi* at 77 K (in prop:but).

| <i>Compound</i>                | $E_0 / \text{cm}^{-1}$ | $\tilde{\nu}_{1/2} / \text{cm}^{-1}$ | $\hbar\omega_{\text{H}} / \text{cm}^{-1}$ | $S_{\text{H}}$ | $\hbar\omega_{\text{L}} / \text{cm}^{-1}$ | $S_{\text{L}}$ | $R$     |
|--------------------------------|------------------------|--------------------------------------|-------------------------------------------|----------------|-------------------------------------------|----------------|---------|
| <i>77 K prop:but</i>           |                        |                                      |                                           |                |                                           |                |         |
| <b>pqiIrDmb</b>                | 18540                  | 620                                  | 1350                                      | 0.94           | 570                                       | 0.60           | 0.99823 |
| <b>pqiIrPhen</b>               | 18520                  | 640                                  | 1360                                      | 0.93           | 590                                       | 0.56           | 0.99847 |
| <b>pqiIrPh<sub>2</sub>phen</b> | 18580                  | 620                                  | 1370                                      | 0.92           | 590                                       | 0.55           | 0.99828 |
| Free <i>pqi</i> H              | 18580                  | 690                                  | 1400                                      | 0.56           | 600                                       | 0.63           | 0.99935 |

## References

- 1 J. C. de Mello, H. F. Wittmann and R. H. Friend, *Adv. Mater.*, 1997, **9**, 230–232.
- 2 M. Grüner, V. Siozios, B. Hagenhoff, D. Breitenstein and C. A. Strassert, *Photochem. Photobiol.*, 2013, **89**, 1406–1412.
- 3 Á. Barroso, M. Grüner, T. Forbes, C. Denz and C. A. Strassert, *ACS Appl. Mater. Interfaces*, 2016, **8**, 15046–15057.
- 4 A. A. Abdel-Shafi, D. R. Worrall and A. Y. Ershov, *Dalt. Trans.*, 2004, 30–36.
- 5 A. Ito, D. J. Stewart, T. E. Knight, Z. Fang, M. K. Brennaman and T. J. Meyer, *J. Phys. Chem. B*, 2013, **117**, 3428–3438.
- 6 CIE-Datatables, [http://www.cie.co.at/publ/abst/datatables15\\_2004/z2.txt](http://www.cie.co.at/publ/abst/datatables15_2004/z2.txt);  
[http://www.cie.co.at/publ/abst/datatables15\\_2004/x2.txt](http://www.cie.co.at/publ/abst/datatables15_2004/x2.txt);  
[http://www.cie.co.at/publ/abst/datatables15\\_2004/y2.txt](http://www.cie.co.at/publ/abst/datatables15_2004/y2.txt), .
- 7 D. Fylstra, L. Lasdon, J. Watson and A. Waren, *Interfaces (Providence)*., 1998, **28**, 29–55.
- 8 C. A. Parker and W. T. Rees, *Analyst*, 1960, **85**, 587–600.
- 9 M. J. Frisch, G. W. Trucks, H. B. Schlegel, G. E. Scuseria, M. A. Robb, J. R. Cheeseman, G. Scalmani, V. Barone, B. Mennucci, G. A. Petersson, H. Nakatsuji, M. Caricato, X. Li, H. P. Hratchian, A. F. Izmaylov, J. Bloino, G. Zheng, J. L. Sonnenberg, M. Hada, M. Ehara, K. Toyota, R. Fukuda, J. Hasegawa, M. Ishida, T. Nakajima, Y. Honda, O. Kitao, H. Nakai, T. Vreven, J. A. M. Jr., J. E. Peralta, F. Ogliaro, M. Bearpark, J. J. Heyd, E. Brothers, K. N. Kudin, V. N. Staroverov, R. Kobayashi, J. Normand, K. Raghavachari, A. Rendell, J. C. Burant, S. S. Iyengar, J. Tomasi, M. Cossi, N. Rega, N. J. Millam, M. Klene, J. E. Knox, J. B. Cross, V. Bakken, C. Adamo, J. Jaramillo, R. Gomperts, R. E. Stratmann, O. Yazyev, A. J. Austin, R. Cammi, C. Pomelli, J. W. Ochterski, R. L. Martin,



- K. Morokuma, V. G. Zakrzewski, G. A. Voth, P. Salvador, J. J. Da, O. Farkas, J. B. Foresman, J. V. Ortiz, J. Cioslowski and D. J. Fox, *Gaussian 09, Revis. A.1, Gaussian, Inc., Wallingford CT.*
- 10 P. J. Hay and W. R. Wadt, *J. Chem. Phys.*, 1985, **82**, 270–283.
- 11 W. R. Wadt and P. J. Hay, *J. Chem. Phys.*, 1985, **82**, 284–298.
- 12 P. J. Hay and W. R. Wadt, *J. Chem. Phys.*, 1985, **82**, 299–310.
- 13 C. Lee, W. Yang and R. G. Parr, *Phys. Rev. B*, 1988, **37**, 785–789.
- 14 A. D. Becke, *J. Chem. Phys.*, 1993, **98**, 5648–5652.
- 15 J. Tomasi, B. Mennucci and R. Cammi, *Chem. Rev.*, 2005, **105**, 2999–3094.
- 16 G. Scalmani and M. J. Frisch, *J. Chem. Phys.*, 2010, **132**, 114110.
- 17 R. Dennington, T. Keith and J. Millam, *GaussView, Version 5, Semichem Inc Shawnee Mission KS.*
- 18 C.-J. Chang, C.-H. Yang, K. Chen, Y. Chi, C.-F. Shu, M.-L. Ho, Y.-S. Yeh and P.-T. Chou, *Dalt. Trans.*, 2007, **2007**, 1881–1890.
- 19 H. Li, P. Winget, C. Risko, J. S. Sears and J.-L. Brédas, *Phys. Chem. Chem. Phys.*, 2013, **15**, 6293–62302.
- 20 T. Tsuboi and W. Huang, *Isr. J. Chem.*, 2014, **54**, 885–896.
- 21 K. P. S. Zanoni, R. L. Coppo, R. C. Amaral and N. Y. Murakami Iha, *Dalt. Trans.*, 2015, **44**, 14559–14573.
- 22 M. S. Lowry and S. Bernhard, *Chem. Eur. J.*, 2006, **12**, 7970–7977.
- 23 M. C. DeRosa and R. J. Crutchley, *Coord. Chem. Rev.*, 2002, **233–234**, 351–371.
